1 **Genetic basis of transgressive segregation in rice heading phenotypes**

2

3 Yohei Koide,<sup>\*,1</sup> Takashi Uchiyama,<sup>\*,1</sup> Yuya Ota,<sup>\*,1</sup> Shuntaro Sakaguchi,<sup>\*</sup> Ayumi

4 Tezuka,<sup>†</sup> Atsushi J. Nagano,<sup>†</sup> Seiya Ishiguro,<sup>\*</sup> Itsuro Takamure,<sup>\*</sup> and Yuji Kishima<sup>\*,2</sup>

5

6 <sup>\*</sup> Research Faculty of Agriculture, Hokkaido University, Kita-9 Nishi-9, Kita-ku,

7 Sapporo, 060-8589, Japan

8 <sup>†</sup> Faculty of Agriculture, Ryukoku University, 1-5 Yokotani, Seta Oe-cho, Otsu, Shiga

9 520-2194, Japan

10 <sup>1</sup> These authors contributed equally.

11

12

13

14

15 Running Title: Rice heading transgressive segregation

16

17 Key words: rice; transgressive segregation; extreme phenotype; days to heading; QTL

18

19 <sup>2</sup> Corresponding author: Research Faculty of Agriculture, Hokkaido University, Kita-9

20 Nishi-9, Kita-ku, Sapporo, 060-8589, Japan. E-mail: kishima@abs.agr.hokudai.ac.jp

21

22

## ABSTRACT

23 Transgressive segregation produces hybrid progeny phenotypes that exceed parental  
24 phenotypes. Unlike heterosis, extreme phenotypes caused by transgressive segregation  
25 are heritably stable. We examined transgressive phenotypes of flowering time in rice.

26 Our previous study examined days to flowering (heading; DTH) in six F<sub>2</sub> populations  
27 for which the parents had distal DTH, and found very few transgressive phenotypes.

28 Here, we demonstrate that transgressive segregation in F<sub>2</sub> populations occurred between

29 parents with proximal DTH. DTH phenotypes of the A58 × Kitaake F<sub>2</sub> progenies

30 frequently exceeded those of both parents. Both A58 and Kitaake are *japonica* rice

31 cultivars adapted to Hokkaido, Japan, which is a high-latitude region, and have short

32 DTH. Among the four known loci required for short DTH, three loci had common

33 alleles in A58 and Kitaake, and only the one locus had different alleles. This result  
34 indicates that there is a similar genetic basis for DTH between the two varieties. We  
35 identified five new quantitative trait loci (QTLs) associated with transgressive DTH  
36 phenotypes by genome-wide single nucleotide polymorphism (SNP) analysis. Each of  
37 these QTLs showed different degrees of additive effects on DTH, and two QTLs had  
38 epistatic effect on each other. These results demonstrated that genome-wide SNP  
39 analysis facilitated detection of genetic loci associated with the extreme phenotypes and  
40 revealed that the transgressive phenotypes were produced by exchanging  
41 complementary alleles of a few minor QTLs in the similar parental genotypes.

42

43

## INTRODUCTION

44 The range of phenotypic variation in a quantitative trait depends on its genetic  
45 complexity (ALONSO-BLANCO AND MENDEZ-VIGO 2014; HUANG AND HAN 2014). Cross  
46 hybridizations often produce progenies with wider phenotypic variation than their  
47 parents, which is referred to as transgressive segregation (RICK AND SMITH 1953;  
48 HARLAN 1976; DE VICENTE AND TANKSLEY 1993). Unlike heterosis, the extreme  
49 phenotypes that occur as a result of transgressive segregation can be fixed after the  
50 second filial generation (F<sub>2</sub>). Such extreme phenotypes can have important roles in

51 evolution (RIESEBERG *et al.* 2002; DITTRICH-REED AND FITZPATRICK 2013). From a  
52 breeding perspective, this phenomenon has also strongly contributed to crop and animal  
53 improvements (VEGA AND FREY 1980; TANKSLEY AND MCCOUCH 1997). However,  
54 little is known about the genetic basis of transgressive segregations, which are  
55 associated with phenotypic improvement of useful traits in crops.  
56  
57 Days to heading (DTH) determines the regional adaptability of rice (*Oryza sativa* L.),  
58 which is cultivated widely in tropical and temperate regions (HORI *et al.* 2016). DTH is  
59 an important agronomic trait that controls flowering time in rice. Flowering time is a  
60 complicated trait in many crops, and the genetic basis of DTH has been well studied in  
61 rice; to date, 14 quantitative trait loci (QTLs) were identified based on natural variation  
62 and isolated by map-based cloning strategies (EBANA *et al.* 2011; HORI *et al.* 2016;  
63 BRAMBILLA *et al.* 2017). We previously examined DTH in rice using six different F2  
64 populations derived from crosses between Kokusyokuto-2 (a Hokkaido landrace  
65 denoted as A58) with a short DTH (81 days) used as the seed parent and six varieties  
66 with long DTH (114–126 days) used as the pollen parents (OTA *et al.* 2014). Most F2  
67 plants from all six crosses showed intermediate DTH that fell within the parental ranges.  
68 OTA *et al.* (2014) found some plants with shorter DTH than A58 from the A58 ×

69 Kasalath F2 population; only this F2 population had some individuals with shorter DTH  
70 relative to those of the parents, and the other five F2 populations did not exhibit such  
71 extreme phenotypes. In the plants with shorter DTH, we identified a genetic interaction  
72 (*Ghd7* from A58 and *Ehd1* from Kasalath) that contributed to the extreme phenotypes  
73 produced by the cross of the distantly related parents (OTA *et al.* 2014).

74

75 Here, we were interested in determining how the range of phenotypic variation is  
76 produced and whether extreme phenotypes can be produced when both parents used in  
77 the cross have proximal phenotypes. The progenies from parents with the same  
78 genotypes would have very narrow phenotypic variation, while certain range of the  
79 phenotypic variation like transgressive phenotypes should be expected in the F2  
80 generation from parents with different genotypes that could coincidentally cause similar  
81 phenotypes. By testing these predictions, we may be able to identify the unknown  
82 genetic entities that produce extreme phenotypes.

83

84 We specifically focused on phenotypic variations in DTH of a population derived from  
85 a cross between two closely related varieties, A58 and Kitaake (an improved variety),  
86 both of which are adapted to Hokkaido, a northernmost rice cultivation area. Compared

87 with the progenies of distantly related parents with distal DTH phenotypes, more A58 ×  
88 Kitaake progenies had extreme short or long DTH phenotypes relative to the parents.  
89 We evaluated the genetic causes of transgressive segregations of both early and late  
90 DTH observed in this segregating population. First, known genes associated with short  
91 DTH were evaluated in A58, Kitaake, and their progenies to determine if transgressive  
92 phenotypes were produced. Subsequently, we performed genome-wide single  
93 nucleotide polymorphism (SNP) analysis to detect unknown QTLs associated with  
94 extremely short or long DTH. The results obtained here demonstrated that a relatively  
95 small number of minor QTLs and their epistatic interactions produced transgressive  
96 segregation in DTH. Important genetic properties of the extreme heading phenotypes  
97 caused by transgressive segregation are discussed.

98

99

## MATERIALS AND METHODS

### 100 *Genetic stocks*

101 A rice landrace from Hokkaido, A58, and an improved variety of Hokkaido, Kitaake,  
102 were used as parents. A58 seeds were obtained from seed stocks at the Plant Breeding  
103 Laboratory in Hokkaido University. Kitaake seeds were obtained from the genebank at  
104 the Agricultural Research Department of Hokkaido Research Organization. A58 was

105 crossed with Kitaake to obtain F1 seeds. A total of 248 F2 plants were obtained from  
106 self-pollination of the F1 plants. From the 248 F2 plants, 132 were randomly selected to  
107 obtain F3 populations. These F3 populations were used for genetic analysis of DTH  
108 using DNA markers in the *Hdl* locus, which is a major locus that affects DTH in rice  
109 (YANO *et al.* 2000). Of the 132 F3 populations, 15 individuals that showed early DTH  
110 and had a fixed *Hdl* genotype were selected as early-heading populations. Similarly, 15  
111 individuals that showed late DTH and had a fixed *Hdl* genotype were selected as  
112 late-heading populations. Plants in these two selected populations were self-pollinated  
113 to produce F4 lines. The genotypes of the 15 early and 15 late lines in the F4 generation  
114 were determined by genome-wide SNP analysis (Figure S1).

115

### 116 ***DTH analysis***

117 Plants were grown in an experimental paddy field at Hokkaido University, Sapporo,  
118 Japan (43.1 N). For F2 and F3 populations, DTH was measured in 2013 and 2014,  
119 respectively. DTH for the F4 generation was measured in 2015 and 2016 as the number  
120 of days from sowing to emergence of the first panicle of a plant. Average DTH of the  
121 F3 and F4 populations were calculated from the values of five or six plants.

122

123 ***Genotyping and sequencing***

124 Genomic DNA was extracted from leaf samples using Plant DNAzol (Invitrogen,  
125 Carlsbad, CA, USA). To genotype the *Hdl* locus, two primers, Hd1L (5'-CGA CGT  
126 GCA GGT GTA CTC CG-3') and Hd1R (5'-AAT CTG TGT AAG CAC TG ACG-3'),  
127 were used based on the *Hdl* sequence. Genome-wide SNPs were detected by double  
128 digest restriction site-associated DNA sequencing (ddRAD-Seq) (BAIRD *et al.* 2008;  
129 PETERSON *et al.* 2012), which began with DNA library preparation using the restriction  
130 enzymes *Bgl*III and *Eco*RI. Sequencing was performed with 51 bp single-end reads in  
131 one lane of a HiSeq2000 Sequencer (Illumina, San Diego, CA, USA) by Macrogen  
132 (Seoul, South Korea). The ddRAD-sequencing reads were trimmed with Trimmomatic  
133 ver 0.33 (BOLGER *et al.* 2014) with the following parameters: LEADING:19  
134 TRAILING:19 SLIDINGWINDOW:30:20 AVGQUAL:20 MINLEN:51. The trimmed  
135 reads were mapped to a RAD reference for the Os-Nipponbare-Reference-IRGSP-1.0  
136 using Bowtie 2 (LANGMEAD AND SALZBERG 2012) with a default parameter setting. To  
137 build RAD loci, we used the ref\_map.pl pipeline in Stacks ver. 1.29 (CATCHEN *et al.*  
138 2011). All RAD-Seq procedures were carried out by Clockmics, Inc. (Izumi, Osaka,  
139 Japan). A total of 1,402 SNPs between parental varieties were detected by ddRAD-Seq;  
140 among these SNPs, 634 were considered reliable after filtering SNPs that appeared in



141 more than 80% of F4 plants.

142

143 PCR amplicons for the four previously identified genes involved in DTH (*Hd1*,  
144 *Hd2/OsPRR37*, *E1/Hd4/Ghd7*, and *Hd5/DTH8*) were purified using a NucleoSpin Gel  
145 and PCR Clean-up kit (Macherey-Nagel, Düren, Germany). Purified samples were  
146 sequenced in both directions using a Big Dye Terminator Cycle Sequencing kit  
147 (Applied Biosystems, Foster City, CA, USA) on an ABI310 automatic sequencer  
148 (Applied Biosystems). Sequence alignment was performed using CLUSTAL W 2.1  
149 (THOMPSON *et al.* 1994). The primers used for sequencing the four genes were as  
150 follows: *Se1/Hd1* [5'-CGA CGT GCA GGT GTA CTC CG-3' and 5'-AAT CTG TGT  
151 AAG CAC TG ACG-3'], *Hd2/OsPRR37* [5'-TCT TTC TGA TGG CTG TCT GC-3'  
152 and 5'-GCC ATC GCG TAG GTA GGT AG-3'], *E1/Hd4/Ghd* [5'-GCT GGC TGG  
153 ACT TCA CTA CC-3' and 5'-CAT GGG CCA CTT CTA AGA TCA-3'], and  
154 *Hd5/DTH8* [5'-CGG AGT TCA TCA GCT TCG TT-3' and 5'-TGA CCA TGG TGT  
155 GAG TGT GA-3'].

156

### 157 ***Transgressive index***

158 We defined the transgressive index, which indicates the proportion of phenotypic

159 differences between both parents and the phenotypic range in the F2 population. The  
160 transgressive index was calculated by dividing the width of the distribution of DTH in  
161 the F2 population by the parental DTH difference.

162

### 163 *Marker genotype value*

164 Allelic effects of each of the six loci that influenced DTH of the A58 × Kitaake hybrid  
165 progenies were evaluated as marker genotype values (GODDARD AND HAYES 2007).

166 Average DTH for each allele was calculated based on DTH data collected from all  
167 homozygous alleles in the 30 F4 population lines from 2016. Then, the central value  
168 was determined based on the two phenotypic averages obtained from each of both  
169 alleles at the same locus. The marker genotype value was equivalent to the difference  
170 between the central value and either allelic average DTH in the same locus.

171

### 172 *Data availability*

173 All genetic stocks and sequence data are available on request. Sequence data for this  
174 study were deposited in DDBJ (DDBJ accession number XXXXX).

175

176

## RESULTS

177 ***Variation and transgressive phenotypes of DTH in A58 × Kitaake progenies***

178 Both A58 and Kitaake are adapted to the high-latitude area between 41.2 N and 45.4 N  
179 in Hokkaido, Japan, and consequently have photoperiod-insensitive, short DTH and are  
180 cold-resistant (ISHIGURO *et al.* 2014; OTA *et al.* 2014). There was no significant DTH  
181 difference between these two varieties (t-test: A58,  $81.2 \pm 0.38$ ; Kitaake,  $80.5 \pm 0.66$ ; P  
182 = 0.19) (Figure 1A). DTH of these F2 plants were widely distributed from 69 to 87 days  
183 (Figure 1A), and the earliest plant DTH was equivalent to that of an extreme  
184 early-heading variety (Figure 1A).

185

186 The transgressive index of the A58 × Kitaake progenies was 25.7 (Figure 1A). In the six  
187 crosses between A58 and the other varieties that were more genetically distant from  
188 A58 than Kitaake (OTA *et al.* 2014), the transgressive indexes ranged from 0.91 to 2.12  
189 (Figure 1B). The transgressive index of DTH indicated that the DTH of A58 × Kitaake  
190 F2 plants exceeded DTH of either parent, but such a strong transgressive segregation  
191 was not observed in the previously published crosses.

192

193 The DTH distribution in the A58 × Kitaake-derived F3 populations was similar to that  
194 of the F2 population (Figure S2). For further analysis, we selected 15 early- and

195 late-heading F3 plants and developed two F4 populations (early and late) by  
196 self-pollination. Average DTH of early- and late-heading F4 populations were  $63.8 \pm$   
197  $1.32$  and  $74.6 \pm 0.99$ , respectively, in 2015, and  $72.2 \pm 1.32$  and  $80.0 \pm 1.00$ ,  
198 respectively, in 2016 (Figure 2). These differences between DTH of the early and late  
199 populations were significant (t-test,  $P < 0.001$ ) throughout 2015 and 2016, and it was  
200 predicted that these two distinct populations were generated by new genetic interactions  
201 derived from the A58  $\times$  Kitaake cross.

202

### 203 ***Sequence analysis of genes that control DTH, and the effect of Hd1 on DTH***

204 Four loci (*E1/Hd4/Ghd7*, *Hd2/OsPRR37*, *Se1/Hd1*, and *Hd5/DTH8*) control DTH in  
205 varieties from Hokkaido, and their specific alleles facilitated adaptation by producing  
206 photoperiod-insensitive varieties with short DTH (ICHTANI *et al.* 1997; FUJINO AND  
207 SEKIGUCHI 2005a; FUJINO AND SEKIGUCHI 2005b; NONOUE *et al.* 2008; FUJINO *et al.*  
208 2013; KOO *et al.* 2013). To confirm whether these four loci are related to the DTH  
209 differences observed in the A58  $\times$  Kitaake F2 population, we compared nucleotide  
210 sequences of these loci (Figure 3). Sequence analysis of *Hd1* showed the presence of  
211 polymorphisms, including a 312-bp insertion/deletion in A58 and Kitaake. This  
212 polymorphism in *Hd1* might have produced the DTH differences observed in the F2

213 population. In contrast to *Hd1*, no polymorphisms were detected in the other three loci  
214 (*E1/Hd4/Ghd7*, *Hd2/OsPRR37*, and *Hd5/DTH8*) in A58 and Kitaake (Figure 3).

215

216 In terms of the effect of the *Hd1* locus on the A58 × Kitaake F2 population, the average  
217 DTH in A58-type homozygous, heterozygous, and Kitaake-homozygous populations  
218 were  $81.3 \pm 0.36$ ,  $79.5 \pm 0.38$ , and  $78.8 \pm 0.46$ , respectively (Table 1). The results  
219 showed that *Hd1* had a significant but small effect on DTH in this population ( $P <$   
220  $0.001$ ), which revealed that the extremely early phenotype of progenies was not fully  
221 explainable by only *Hd1*, and another factor(s) may be involved.

222

### 223 ***Detection of SNPs associated with extreme DTH phenotypes***

224 If a QTL for DTH was located near an SNP, the SNP alleles tended to be associated  
225 with early- or late-heading populations. Genome-wide SNP analysis using ddRAD-Seq  
226 provided us a total of 634 reliable SNPs for 15 early and 15 late lines in the F4  
227 populations (Figure 4). Among the 634 SNPs, 27 were detected as loci where the  
228 frequency of either the A58- or Kitaake-type allele was distorted in early- or  
229 late-heading populations (Table 2). Of these possible DTH phenotype-related SNPs, we  
230 focused on 19 SNPs that belonged to five clusters on Chs 1, 2, 4, 6, and 10 (Table 2 and

231 Figure 4); these SNP clusters represented the chromosomal regions where QTLs for  
232 DTH were present.

233

### 234 ***Validation of relationships between SNP genotypes and DTH***

235 Table 2 shows average DTH between two alleles of each of the five SNP clusters in the  
236 F4 lines examined in 2015 and 2016. Significant differences ( $P < 0.001$ ) in DTH  
237 between A58- and Kitaake-type homozygous alleles were observed in SNPs on Ch 4 in  
238 both 2015 and 2016 (Table 2 and Figure S3). In the SNP cluster on Ch 10, significant  
239 differences in DTH between the two alleles were also observed, although the difference  
240 was small in 2016. SNPs on Chs 1 and 6 weakly significantly differed between the two  
241 alleles that were only observed in 2015. Among the five clusters, the weakest effect was  
242 detected in the Ch 2 cluster, which was not significant ( $P = 0.14$ ), but still clearly  
243 discriminated the two alleles by 3 to 4 days. Overall, the order of the five SNP clusters  
244 based on additive effects on DTH was: Ch 4 > (*HdI*) > 10 > 6 > 1 > 2. The  
245 Kitaake-derived alleles in the SNPs on Chs 4, 10, and 6 produced shorter DTH than the  
246 A58-derived alleles; alternatively, the A58-derived alleles on Chs 1 and 2 produced  
247 shorter DTH than the Kitaake-derived alleles.

248

249 Among the selected chromosomal regions (Chs 1, 4, 6, and 10), genetic interactions  
250 were tested using the F2 population (Figure 1). Among several combinations of possible  
251 epistatic interactions, a strong genetic interaction was identified in the SNPs on Chs 1  
252 and 10 (Figures 5 and S4). The A58-derived alleles in the SNPs on Ch1 decreased DTH  
253 when they were combined with Kitaake-derived alleles in SNPs on Ch 10, but increased  
254 DTH when combined with A58-derived alleles in SNPs on Ch 10 (Figure 5). No known  
255 genes associated with DTH are located around these two chromosomal regions. These  
256 findings revealed that unknown genes from A58 and Kitaake caused epistatic  
257 interactions responsible for the transgressive early phenotype.

258

259 Loci weighted by marker genotype values based on DTH data from 2016 are shown in  
260 Figure 6. Among a total of 30 F4 lines, nine harbored homozygous alleles at all six loci  
261 (the five QTLs and *Hdl*). These nine lines were sorted by DTH (Figure 6). Based on  
262 marker genotype values, direction of allelic effect, and the numbers of the alleles with  
263 an effect, the order based on DTH was reasonable, although it was not identical to the  
264 expectation, because of possible genetic interactions or unknown genes. The short DTH  
265 lines tended to have more alleles with a short DTH effect, whereas the long DTH lines  
266 contained more alleles with the opposite effect. Therefore, the extreme phenotypes

267 produced by transgressive segregation might be defined by allelic composition with  
268 different phenotypic effects occurring in either direction.

269

270

## DISCUSSION

271 Here, we showed that transgressive segregation occurred in the hybrid progenies of two  
272 rice varieties, A58 and Kitaake, both of which have short DTH as an adaptation to  
273 high-latitude region. Phenotypic variation beyond the parental range was observed in  
274 this segregating population and facilitated uncovering of the genetic basis of  
275 transgressive segregation and extreme DTH phenotypes. The two parental varieties  
276 shared the same genotypes for three known major QTLs (*E1/Hd4/Ghd7*, *Hd2/OsPRR37*,  
277 and *Hd5/DTH8*) (Figure 3), but different alleles for *Se1/Hd1* and several unknown  
278 minor QTLs. Such different genotypes in minor QTLs produced new genetic  
279 combinations that resulted in transgressive phenotypes of the progenies. QTLs direct  
280 either positive or negative actions based on the effect of parental alleles. If negative  
281 QTL alleles in either parent are replaced by the positive alleles of the other parent, the  
282 progeny could obtain the desired phenotype because of the presence of more positive  
283 alleles (DE VICENTE AND TANKSLEY 1993; RIESEBERG *et al.* 1999). Our results appeared  
284 to demonstrate this scenario, because we observed allelic complementation at QTLs,



285 and indicate the importance of such “hidden” genetic variations despite close genetic  
286 relationships (HAGIWARA *et al.* 2006).

287

288 We employed SNP analysis with deep sequencing to obtain a sufficient number of  
289 markers for the closely related varieties. This was a powerful approach that detected  
290 more than 600 genome-wide SNPs between both Hokkaido-adapted varieties (Figure 4).

291 In addition, such similar genetic backgrounds of the two varieties, A58 and Kitaake,  
292 facilitated identification of the minor QTLs that shape transgressive early heading by  
293 genome-wide SNP analysis.

294

295 Our analysis detected five SNP clusters that corresponded to QTLs and the *Hd1* locus,  
296 which contributed to DTH differences in the A58 × Kitaake progenies (Table 1 and 2).

297 These QTLs were involved in both the additive and epistatic effects on extreme heading  
298 phenotypes (Table 2 and Figure 5). Among the SNP clusters, the strongest effect was

299 explained by the Ch 4 cluster, in which the Kitaake-derived allele(s) caused decreased

300 DTH (Table 2). The Ch 4 cluster was located from 29.8 to 32.4 Mb on Ch 4 (Figure 4),

301 where only one gene, *Rice FLO-LFY homolog (RFL)* (KYOZUKA *et al.* 1998), is

302 functionally characterized as a flowering-related gene by the QTL Annotation Rice

303 Online (Q-TARO) database (<http://qtaro.abr.affrc.go.jp/>). Similarly, the Ch 6 cluster  
304 (from 24.5 to 25.5 Mb) included a gene for photoperiod sensitivity, *Se5* (IZAWA *et al.*  
305 2000). However, no functional polymorphisms in A58 and Kitaake were detected in  
306 either *RFL* or *Se5*. In the other QTLs found in the SNP clusters on Chs 1, 2, and 10, no  
307 known DTH-related genes were identified. These results demonstrated that some  
308 unknown genes present in these SNP clusters affected DTH of the Hokkaido varieties.  
309 Interestingly, our analysis also showed possible epistatic interactions between genes in  
310 SNP clusters on Chs 1 and 10 that shortened DTH (Figure 5). It was previously thought  
311 that epistasis is unlikely to be a major cause of transgressive phenotypes (DE VICENTE  
312 AND TANKSLEY 1993; RIESEBERG *et al.* 1999); however, in our study, epistatic  
313 interactions explained the transgressive phenotypes observed in the segregating  
314 populations (Figure 5).

315

316 To date, four genes (*E1/Hd4/Ghd7*, *Hd2/OsPRR37*, *Se1/Hd1*, and *Hd5/DTH8*) were  
317 reported to control DTH in improved rice varieties in Hokkaido (ICHITANI *et al.* 1997;  
318 FUJINO AND SEKIGUCHI 2005a; FUJINO AND SEKIGUCHI 2005b; NONOUE *et al.* 2008;  
319 FUJINO *et al.* 2013; KOO *et al.* 2013). Among the four genes, loss of functional alleles in  
320 *E1/Hd4/Ghd7* and *Hd2/OsPRR37* are necessary to obtain photoperiod insensitivity in

321 rice varieties in northern areas (FUJINO AND SEKIGUCHI 2005a; FUJINO AND SEKIGUCHI  
322 2005b; XUE *et al.* 2008; KOO *et al.* 2013). Alternatively, the other two genes (*Se1/Hd1*  
323 and *Hd5/DTH8*) have small effects on photoperiod insensitivity among the varieties in  
324 Hokkaido (ICHTANI *et al.* 1997; FUJINO AND SEKIGUCHI 2005b; NONOUE *et al.* 2008). In  
325 this study, *Se1/Hd1* sequences revealed differences between A58 and Kitaake; A58 has  
326 insertion/deletion mutations, whereas Kitaake has the functional allele (Figure 3). Both  
327 varieties had the same loss-of-function alleles in the *E1/Hd4/Ghd7* and *Hd2/OsPRR37*  
328 loci and had the same functional allele in the *Hd5/DTH8* locus (Figure 3). These results  
329 indicated that the improved varieties in Hokkaido might have inherited the same  
330 *E1/Hd4/Ghd7*, *Hd2/OsPRR37*, and *Hd5/DTH8* alleles from a landrace similar to A58,  
331 which facilitated adaptation, because photoperiod insensitivity was essential for  
332 adaptation. In addition to these four loci, newly identified minor QTLs were identified  
333 for DTH on Chs 1, 2, 4, 6 and 10 (Table 2 and Figure 4). These QTLs likely contribute  
334 to extreme phenotypes of short and long DTH produced by transgressive segregation  
335 based on the composition of their complementary alleles (Figure 6).

336

337 RIESEBERG *et al.* (1999) made several predictions regarding the cause of transgressive  
338 segregation, one of which was consistent with our results: transgressive segregation

339 would likely be observed in the F2 population of parents with more proximal  
340 phenotypes (Figure 7). Among the known alleles at the four known loci that are  
341 necessary for DTH adaptation to Hokkaido, A58 and Kitaake shared the same alleles at  
342 three loci, but not *Hdl*, which indicates that these two varieties possess a considerable  
343 amount of common alleles that shorten DTH. Our results demonstrate that transgressive  
344 segregation mainly occurred as a result of a few unknown QTLs, in which alleles  
345 combined in a complementary manner (Figure 7).

346

347 According to RIESEBERG *et al.* (1999), transgressive segregation tends to occur more  
348 frequently in intraspecific crosses, inbred populations, and domesticated populations  
349 compared with interspecific crosses, outbred populations, and wild populations,  
350 respectively. The lack of a strong positive correlation was observed between parental  
351 genetic divergence and transgression frequency (RIESEBERG *et al.* 1999; RIESEBERG *et*  
352 *al.* 2003). Our previous study (OTA *et al.* 2014) showed that the hybrid progenies of two  
353 varieties with distal DTH adapted to different environments exhibited few instances of  
354 transgressive DTH phenotypes (Figure 1). Because the parents were adapted to different  
355 environments with different genetic backgrounds (e.g., interspecies), a number of the  
356 new allelic combinations were generated in the hybrid progenies (Figure 7). Such

357 complex allelic combinations might generate positive and negative genetic interactions,  
358 and offset allelic effects. Stochastically, if there is a large number of segregating loci,  
359 individuals rarely accumulate only the alleles with positive effects, but most usually  
360 contain alleles with negative effects (Figure 7).

361

362 This study showed that a few genes and their combinations expanded variation of the  
363 DTH phenotype despite similar genetic backgrounds. Consequently, it might be useful  
364 to identify QTLs or allelic interactions associated with the transgressive DTH  
365 phenotypes in progenies of other varieties with proximal phenotypes. Similarly, to  
366 integrate other transgressive phenotypes into breeding programs, alleles with additive  
367 effects of minor QTLs should be targeted in varieties with proximal phenotypes.

368

## 369 **ACKNOWLEDGMENTS**

370 We are grateful to Ms. K. Aoyama (Lab. Plant Breeding, Hokkaido University) for her  
371 help conducting this study. Kitaake seeds were kindly supplied by the Agricultural  
372 Research Department of Hokkaido Research Organization. This work was supported by  
373 Takano Life Science Research Foundation and JSPS KAKENHI Grant Number  
374 23658001 (to Y. Kishima), and the Program for Fostering Researchers for the Next

375      Generation of the Consortium Office for Fostering of Researchers in Future Generations  
376      (COFRe), Hokkaido University (to Y. Koide). We thank Mallory Eckstut, PhD, from  
377      Edanz Group ([www.edanzediting.com/ac](http://www.edanzediting.com/ac)) for editing a draft of this manuscript.  
378

379

## FIGURE LEGENDS

380 **Figure 1** Transgressive segregation and genetic relationships between parental varieties.

381 (A) Frequency distribution of DTH from A58 × Kitaake F2 plants. The transgressive

382 index represents the ratio of the of the F2 population DTH distribution to the parental

383 difference. The DTH difference between A58 and Kitaake was 0.7 days, and the DTH

384 range in the F2 population was 18.0 days, which resulted in a transgressive index of

385 25.7. Standard DTH values of 11 varieties in Hokkaido are indicated by gray

386 arrowheads: (a) Kitaibuki, (b) Hakucho-mochi, (c) Daichinohoshi (d) Hatsushizuku, (e)

387 Hoshinoyume, (f) Kuiku180, (g) Hokuiku-mochi, (h) Nanatsuboshi, (i) Kirara397, (j)

388 Hoshimaru, and (k) Gimpu. (B) Transgressive indexes of crosses between A58 and each

389 of five other varieties. The phylogenetic relationships and the associated dendrogram

390 for the five *O. sativa* varieties, Nipponbare (*japonica*), T65 (*japonica*), IR36 (*indica*),

391 #108 (*indica*), and Kasalath (*indica*, Aus), are presented based on information provided

392 in TAKATA *et al.* (2005). To calculate the transgressive index, DTH of parental varieties

393 and F2 plants were calculated based on data from OTA *et al.* (2014).

394

395 **Figure 2** Frequency distribution of DTH in early- and late-heading F4 lines derived

396 from the A58 × Kitaake cross in 2015 and 2016.

397 DTH of the 15 early- and 15 late-heading F4 lines selected in the F3 population was  
398 examined in the two years, 2015 and 2016. Early- and late-heading lines are indicated  
399 by white and black, respectively. Kitaake and A58 DTH are indicated by white and  
400 black arrowheads, respectively, with bars indicating S. E.

401

402 **Figure 3** Comparisons of partial nucleotide sequences from Nipponbare, A58, and  
403 Kitaake for the four major loci that affect DTH in Hokkaido.

404 The sequenced positions (based on Nipponbare) were selected using known  
405 polymorphisms among varieties in Hokkaido that were observed in previous studies  
406 (ICHTANI *et al.* 1997; FUJINO AND SEKIGUCHI 2005a; FUJINO AND SEKIGUCHI 2005b;  
407 NONOUE *et al.* 2008; FUJINO *et al.* 2013; KOO *et al.* 2013). *Hd1* showed multiple  
408 differences between A58 and Kitaake; Kitaake possesses a functional allele that is also  
409 found in Nipponbare. In *DTH8*, a 19-bp segment (indicated by a rectangle) was deleted  
410 in most of the other Hokkaido varieties, but not in Nipponbare, A58, and Kitaake, from  
411 which we could not detect any polymorphisms. For *Ghd7* and *OsPRR37*, SNPs  
412 observed in Nipponbare and the other two varieties are indicated by boxes.

413

414 **Figure 4** Chromosomal positions of five SNP clusters.



415 Physical map positions of each SNP detected by ddRAD-Seq are shown by horizontal  
416 bars in each chromosome. Positions of SNP clusters that showed significant differences  
417 in allele frequency between early- and late-heading populations are indicated by vertical  
418 bars on the right side of each chromosome.

419

420 **Figure 5** Epistatic interaction between SNPs on chromosomes 1 and 10 on DTH

421 observed in 2015 and 2016.

422 Average DTH values for the four combinations of genotypes with central SNPs

423 (C1\_2301 and C10\_43613) in the clusters on Chs 1 and 10, which are indicated by

424 squares. The case of Chs 1 and 10 were selected from all the combinations with Chs 1, 4,

425 6 and 10 (Figure S4). When the A58 SNP on Ch 10 (black line) and Kitaake SNP on Ch

426 10 (gray line) were respectively coupled with the different parental SNPs, epistatic

427 (allelic) interactions occurred; in particular, the combination of the A58 allele on Ch 1

428 and Kitaake allele on Ch 10 resulted in the shortest DTH.

429

430 **Figure 6** Phenotypic relationships with combinations of six marker genotype values.

431 Among the 30 F4 lines, nine retained the homozygous alleles in the six loci that

432 corresponded to the SNP clusters with QTLs for DTH and *Hdl*. The effect of each locus

433 on DTH was weighted according to marker genotype values (see Materials and  
434 Methods) based on DTH in 2016. Larger values indicate a stronger effect on DTH.  
435 Empty squares indicate shorter DTH effects relative to black squares. Kitaake contained  
436 four shorter DTH alleles in Ch 4, *Hdl*, Ch 10, and Ch 6, whereas A58 possessed two  
437 shorter DTH alleles in Ch 2 and Ch 1. The two parental cultivars, Kitaake and A58, had  
438 DTH of 74.1 and 75.1 days, respectively. DTH in the selected F4 lines ranged from 60.6  
439 to 79.0 days. Each marker name indicates the central SNP in the cluster.

440

441 **Figure 7** Model of different segregation patterns that occurred in the F2 populations  
442 derived from two parental combinations of proximal and distal DTH phenotypes.  
443 The left panel represents the segregation pattern of the F2 population between parent-a  
444 and -b with proximal DTH phenotypes due to the similar genotypes with a few  
445 differences. Because of differences in a few alleles with minor effects on DTH, the F2  
446 progenies produced transgressive phenotypes. The right panel represents the F2  
447 population produced by parents with distal phenotypes and opposite genotypes shows  
448 intermediate segregation between both parents. Most of the F2 progenies with mixed  
449 genotypes of the parental alleles did not have DTH phenotypes that exceeded those of  
450 the parental phenotypes. There are seven loci involved in DTH, and their effects on

451 DTH are ordered as 1 >>> 7. S and L indicate the effect of an allele at each locus that  
452 makes DTH shorter or longer, respectively.

453

454 **Figure S1** Experimental scheme of this study. ddRAD-Seq was carried out to detect  
455 differences in allele frequency of genome-wide SNPs between early- and late-heading  
456 F4 lines.

457

458 **Figure S2** Frequency distribution of DTH in the F3 population derived from the A58 ×  
459 Kitaake cross.

460

461 **Figure S3** Effect of the Ch 4 SNP cluster on DTH in 2015 and 2016.  
462 Average DTH values of F4 lines with homozygous A58- and Kitaake-type alleles of the  
463 SNP cluster on Ch 4, which is represented by the central SNP in the cluster, C4\_19396.  
464 Significant differences ( $P < 0.01$ ) between average DTH values were observed in both  
465 2015 and 2016.

466

467 **Figure S4** Genetic interactions between SNP clusters on Chs 1, 4, 6, and 10 relative to  
468 DTH in 2015.

469 Average DTH values (y-axis) of F4 lines with each genotype are shown in squares. Six  
470 combinations of any two loci among the SNP clusters on Chs 1, 4, 6 and 10 are depicted.  
471 A58-type alleles (black line) and Kitaake-type alleles (gray line) are paired with another  
472 locus corresponding to A58-type alleles (the left side) or Kitaake-type alleles (the right  
473 side) in x-axis, respectively. An allelic interaction (non-additive interaction) was  
474 detectable where the black line crossed the gray line.

475

476

477

### Literature Cited

478

479

480 Alonso-Blanco, C., and B. Mendez-Vigo, 2014 Genetic architecture of naturally  
481 occurring quantitative traits in plants: an updated synthesis. *Current Opinion in*  
482 *Plant Biology* 18: 37-43.

483 Baird, N. A., P. D. Etter, T. S. Atwood, M. C. Currey, A. L. Shiver *et al.*, 2008 Rapid  
484 SNP Discovery and Genetic Mapping Using Sequenced RAD Markers. *Plos One*  
485 3.

- 486 Bolger, A. M., M. Lohse and B. Usadel, 2014 Trimmomatic: a flexible trimmer for  
487 Illumina sequence data. *Bioinformatics* 30: 2114-2120.
- 488 Brambilla, V., J. Gomez-Ariza, M. Cerise and F. Fornara, 2017 The Importance of  
489 Being on Time: Regulatory Networks Controlling Photoperiodic Flowering in  
490 Cereals. *Frontiers in Plant Science* 8.
- 491 Catchen, J. M., A. Amores, P. Hohenlohe, W. Cresko and J. H. Postlethwait, 2011  
492 Stacks: Building and Genotyping Loci De Novo From Short-Read Sequences.  
493 *G3-Genes Genomes Genetics* 1: 171-182.
- 494 de Vicente, M. C., and S. D. Tanksley, 1993 Qtl Analysis of Transgressive Segregation  
495 in an Interspecific Tomato Cross. *Genetics* 134: 585-596.
- 496 Dittrich-Reed, D. R., and B. M. Fitzpatrick, 2013 Transgressive Hybrids as Hopeful  
497 Monsters. *Evol Biol* 40: 310-315.
- 498 Ebana, K., T. Shibaya, J. Z. Wu, K. Matsubara, H. Kanamori *et al.*, 2011 Uncovering of  
499 major genetic factors generating naturally occurring variation in heading date  
500 among Asian rice cultivars. *Theoretical and Applied Genetics* 122: 1199-1210.
- 501 Fujino, K., and H. Sekiguchi, 2005a Mapping of QTLs conferring extremely early

- 502 heading in rice (*Oryza sativa* L.). *Theoretical and Applied Genetics* 111:  
503 393-398.
- 504 Fujino, K., and H. Sekiguchi, 2005b Identification of QTLs conferring genetic variation  
505 for heading date among rice varieties at the northern-limit of rice cultivation.  
506 *Breeding Science* 55: 141-146.
- 507 Fujino, K., U. Yamanouchi and M. Yano, 2013 Roles of the Hd5 gene controlling  
508 heading date for adaptation to the northern limits of rice cultivation. *Theoretical*  
509 *and Applied Genetics* 126: 611-618.
- 510 Goddard, M. E., and B. J. Hayes, 2007 Genomic selection. *Journal of Animal Breeding*  
511 *and Genetics* 124: 323-330.
- 512 Hagiwara, W. E., K. Onishi, I. Takamure and Y. Sano, 2006 Transgressive segregation  
513 due to linked QTLs for grain characteristics of rice. *Euphytica* 150: 27-35.
- 514 Harlan, J. R., 1976 Genetic Resources in Wild Relatives of Crops. *Crop Science* 16:  
515 329-333.
- 516 Hori, K., K. Matsubara and M. Yano, 2016 Genetic control of flowering time in rice:  
517 integration of Mendelian genetics and genomics. *Theoretical and Applied*

- 518                   Genetics 129: 2241-2252.
- 519   Huang, X. H., and B. Han, 2014 Natural Variations and Genome-Wide Association  
520                   Studies in Crop Plants. Annual Review of Plant Biology, Vol 65 65: 531-551.
- 521   Ichitani, K., Y. Okumoto and T. Tanisaka, 1997 Photoperiod sensitivity gene of Se-1  
522                   locus found in photoperiod insensitive rice cultivars of the northern limit region  
523                   of rice cultivation. Breeding Science 47: 145-152.
- 524   Ishiguro, S., K. Ogasawara, K. Fujino, Y. Sato and Y. Kishima, 2014 Low  
525                   Temperature-Responsive Changes in the Anther Transcriptome's Repeat  
526                   Sequences Are Indicative of Stress Sensitivity and Pollen Sterility in Rice  
527                   Strains. Plant Physiology 164: 671-682.
- 528   Izawa, T., T. Oikawa, S. Tokutomi, K. Okuno and K. Shimamoto, 2000 Phytochromes  
529                   confer the photoperiodic control of flowering in rice (a short-day plant). Plant  
530                   Journal 22: 391-399.
- 531   Koo, B. H., S. C. Yoo, J. W. Park, C. T. Kwon, B. D. Lee *et al.*, 2013 Natural Variation  
532                   in OsPRR37 Regulates Heading Date and Contributes to Rice Cultivation at a  
533                   Wide Range of Latitudes. Molecular Plant 6: 1877-1888.

- 534 Kyoizuka, J., S. Konishi, K. Nemoto, T. Izawa and K. Shimamoto, 1998  
535 Down-regulation of RFL, the FLO/LFY homolog of rice, accompanied with  
536 panicle branch initiation. Proceedings of the National Academy of Sciences of  
537 the United States of America 95: 1979-1982.
- 538 Langmead, B., and S. L. Salzberg, 2012 Fast gapped-read alignment with Bowtie 2.  
539 Nature Methods 9: 357-U354.
- 540 Nonoue, Y., K. Fujino, Y. Hirayama, U. Yamanouchi, S. Y. Lin *et al.*, 2008 Detection  
541 of quantitative trait loci controlling extremely early heading in rice. Theoretical  
542 and Applied Genetics 116: 715-722.
- 543 Ota, Y., S. Ishiguro, E. Aoyama, R. Aiba, R. Iwashiro *et al.*, 2014 Isolation of a major  
544 genetic interaction associated with an extreme phenotype using assorted F2  
545 populations in rice. Molecular Breeding 33: 997-1003.
- 546 Peterson, B. K., J. N. Weber, E. H. Kay, H. S. Fisher and H. E. Hoekstra, 2012 Double  
547 Digest RADseq: An Inexpensive Method for De Novo SNP Discovery and  
548 Genotyping in Model and Non-Model Species. Plos One 7.
- 549 Rick, C. M., and P. G. Smith, 1953 Novel Variation in Tomato Species Hybrids.



- 550 American Naturalist 87: 359-373.
- 551 Rieseberg, L. H., M. A. Archer and R. K. Wayne, 1999 Transgressive segregation,  
552 adaptation and speciation. Heredity 83: 363-372.
- 553 Rieseberg, L. H., A. Widmer, A. M. Arntz and J. M. Burke, 2002 Directional selection  
554 is the primary cause of phenotypic diversification. Proceedings of the National  
555 Academy of Sciences of the United States of America 99: 12242-12245.
- 556 Rieseberg, L. H., A. Widmer, A. M. Arntz and J. M. Burke, 2003 The genetic  
557 architecture necessary for transgressive segregation is common in both natural  
558 and domesticated populations. Philosophical Transactions of the Royal Society  
559 of London Series B-Biological Sciences 358: 1141-1147.
- 560 Takata, M., Y. Kishima and Y. Sano, 2005 DNA methylation polymorphisms in rice  
561 and wild rice strains: Detection of epigenetic markers. Breeding Science 55:  
562 57-63.
- 563 Tanksley, S. D., and S. R. McCouch, 1997 Seed banks and molecular maps: Unlocking  
564 genetic potential from the wild. Science 277: 1063-1066.
- 565 Thompson, J. D., D. G. Higgins and T. J. Gibson, 1994 Clustal-W - Improving the

- 566           Sensitivity of Progressive Multiple Sequence Alignment through Sequence  
567           Weighting, Position-Specific Gap Penalties and Weight Matrix Choice. *Nucleic  
568           Acids Research* 22: 4673-4680.
- 569   Vega, U., and K. J. Frey, 1980 Transgressive Segregation in Inter and Intraspecific  
570           Crosses of Barley. *Euphytica* 29: 585-594.
- 571   Xue, W. Y., Y. Z. Xing, X. Y. Weng, Y. Zhao, W. J. Tang *et al.*, 2008 Natural variation  
572           in *Ghd7* is an important regulator of heading date and yield potential in rice.  
573           *Nature Genetics* 40: 761-767.
- 574   Yano, M., Y. Katayose, M. Ashikari, U. Yamanouchi, L. Monna *et al.*, 2000 *Hd1*, a  
575           major photoperiod sensitivity quantitative trait locus in rice, is closely related to  
576           the arabidopsis flowering time gene *CONSTANS*. *Plant Cell* 12: 2473-2483.  
577

**Table 1** The effect of Hd1 locus on days to heading in F2 population derived from A58 x Kitaake cross

| Marker |      | No. of plants |          |              | Average DTH  |          |              | <i>P</i> |                    |
|--------|------|---------------|----------|--------------|--------------|----------|--------------|----------|--------------------|
| name   | Chr. | Position      | A58-type | Heterozygous | Kitaake-type | A58-type | Heterozygous |          | Kitaake-type       |
| Hd1    | 6    |               | 56       | 103          | 73           | 81.3     | 79.5         | 78.8     | $4 \times 10^{-4}$ |

**Table 2** The effect of SNP clusters on days to heading in F4 lines derived from the cross between A58 and Kitaake

| Marker name | Chr. | Position   | DTH (2015) |              |               | DTH (2016) |              |               |
|-------------|------|------------|------------|--------------|---------------|------------|--------------|---------------|
|             |      |            | A58-type   | Kitaake-type | <i>P</i>      | A58-type   | Kitaake-type | <i>P</i>      |
| C1_2292     | 1    | 25,250,821 | 68.5±2.02  | 73.6±1.78    | 0.07856       | 75.9±1.72  | 79.3±1.72    | 0.1745        |
| C1_2301     | 1    | 25,270,205 | 68.5±2.02  | 73.6±1.78    | 0.07856       | 75.9±1.72  | 79.3±1.72    | 0.1745        |
| C1_2745     | 1    | 28,608,975 | 68.1±1.85  | 73.4±1.54    | 0.03627 *     | 75.3±1.59  | 79.0±1.52    | 0.1095        |
| C1_2968     | 1    | 30,128,355 | 66.9±1.96  | 72.7±1.66    | 0.03616 *     | 74.1±1.94  | 78.1±1.46    | 0.1195        |
| C2_10782    | 2    | 790,734    | 68.1±1.83  | 71.8±1.59    | 0.139         | 74.8±1.65  | 78.1±1.47    | 0.1461        |
| C2_10784    | 2    | 790,866    | 68.1±1.83  | 71.8±1.59    | 0.139         | 74.8±1.65  | 78.1±1.47    | 0.1461        |
| C4_19210    | 4    | 29,823,605 | 74.8±1.14  | 66.6±1.61    | 0.0003583 *** | 81.9±0.65  | 73.7±1.34    | 0.000012 ***  |
| C4_19304    | 4    | 30,511,751 | 76.3±1.03  | 66.1±1.61    | 0.0000237 *** | 82.1±0.72  | 73.2±1.43    | 0.0000162 *** |
| C4_19390    | 4    | 31,264,195 | 76.9±1.08  | 65.1±1.39    | 1.13E-06 ***  | 82.5±0.74  | 72.5±1.3     | 1.07E-06 ***  |
| C4_19586    | 4    | 32,438,249 | 75.5±1.21  | 65.7±1.43    | 0.0000955 *** | 81.6±0.68  | 72.9±1.31    | 9.34E-06 ***  |
| C6_27238    | 6    | 24,515,347 | 66.5±1.72  | 70.3±1.91    | 0.2326        | 73.5±1.78  | 76.6±1.62    | 0.1031        |
| C6_27270    | 6    | 24,574,372 | 71.9±1.64  | 65.7±2.03    | 0.02257 *     | 77.2±1.78  | 73.8±1.51    | 0.1675        |
| C6_27338    | 6    | 24,978,329 | 71.1±1.78  | 66.6±2.16    | 0.09858       | 76.5±1.67  | 75.1±1.92    | 0.5787        |
| C6_27340    | 6    | 24,985,031 | 71.3±1.57  | 65.2±2.24    | 0.04015 *     | 76.9±1.53  | 73.3±1.74    | 0.178         |
| C6_27365    | 6    | 25,230,125 | 71.7±1.67  | 66.0±2.21    | 0.0532        | 77.6±1.59  | 74.5±1.67    | 0.1907        |
| C6_27415    | 6    | 25,515,786 | 71.5±1.67  | 66.9±2.03    | 0.1137        | 77.3±1.59  | 75.1±1.51    | 0.3546        |
| C10_43613   | 10   | 593,246    | 71.9±1.68  | 64.4±1.93    | 0.008726 ***  | 77.3±1.42  | 72.1±1.9     | 0.04205 *     |
| C10_43829   | 10   | 709,525    | 72.5±1.4   | 65.7±2.28    | 0.022 *       | 78.1±1.22  | 73.3±2.42    | 0.09918       |
| C10_43830   | 10   | 709,622    | 72.8±1.47  | 65.7±2.06    | 0.01105 *     | 78.2±1.3   | 73.5±2.2     | 0.08329       |

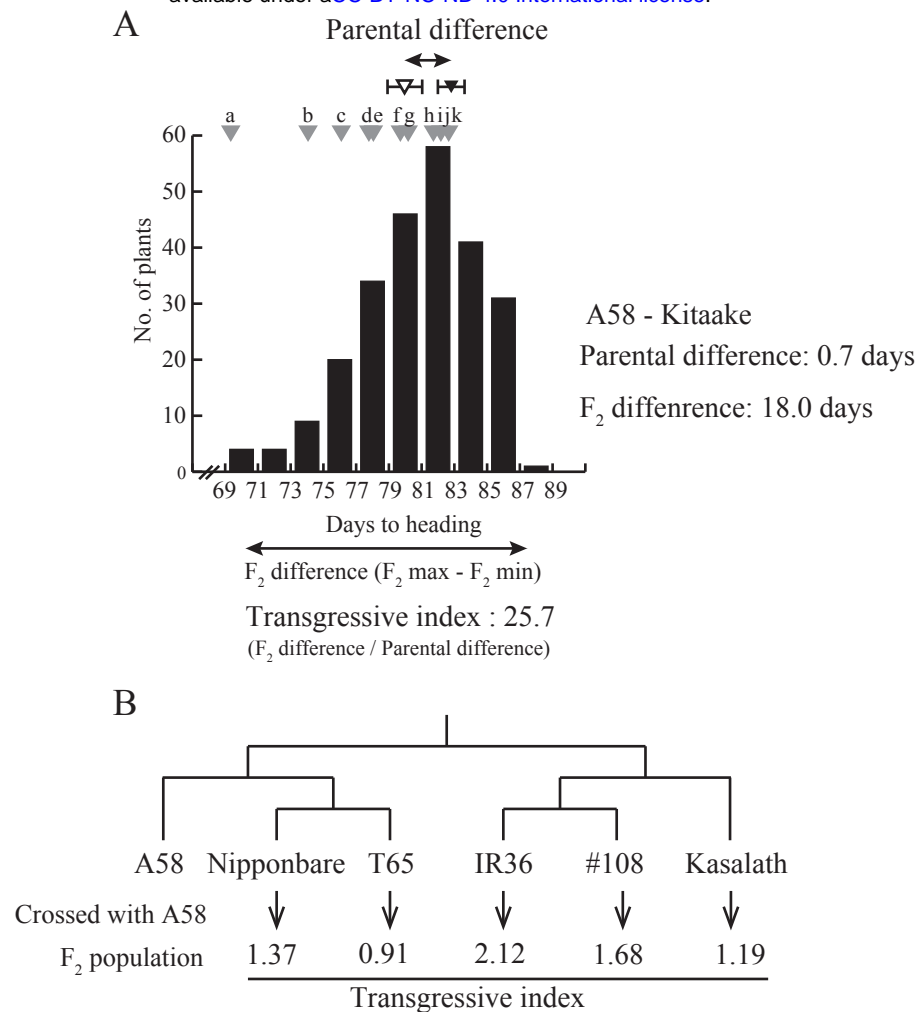

**Figure 1** Transgressive segregation and genetic relationships between parental varieties.

(A) Frequency distribution of DTH from A58 × Kitaake F<sub>2</sub> plants. The transgressive index represents the ratio of the of the F<sub>2</sub> population DTH distribution to the parental difference. The DTH difference between A58 and Kitaake was 0.7 days, and the DTH range in the F<sub>2</sub> population was 18.0 days, which resulted in a transgressive index of 25.7. Standard DTH values of 11 varieties in Hokkaido are indicated by gray arrowheads: (a) Kitaibuki, (b) Hakucho-mochi, (c) Daichinohoshi (d) Hatsushizuku, (e) Hoshinoyume, (f) Kuiku180, (g) Hokuiku-mochi, (h) Nanatuboshi, (i) Kirara397, (j) Hoshimaru, and (k) Gimpu. (B) Transgressive indexes of crosses between A58 and each of five other varieties. The phylogenetic relationships and the associated dendrogram for the five *O. sativa* varieties, Nipponbare (japonica), T65 (japonica), IR36 (indica), #108 (indica), and Kasalath (indica, Aus), are presented based on information provided in TAKATA et al. (2005). To calculate the transgressive index, DTH of parental varieties and F<sub>2</sub> plants were calculated based on data from OTA et al. (2014).

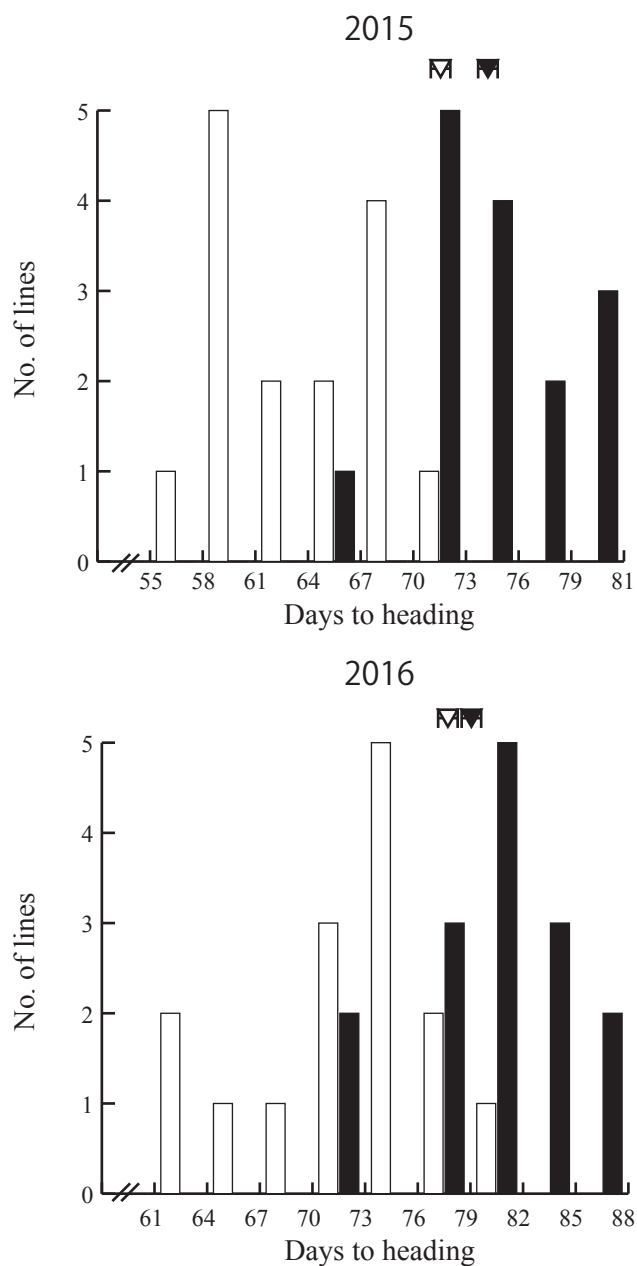

**Figure 2** Frequency distribution of DTH in early- and late-heading F4 lines derived from the A58 × Kitaake cross in 2015 and 2016.

DTH of the 15 early- and 15 late-heading F4 lines selected in the F3 population was examined in the two years, 2015 and 2016. Early- and late-heading lines are indicated by white and black, respectively. Kitaake and A58 DTH are indicated by white and black arrowheads, respectively, with bars indicating S. E.

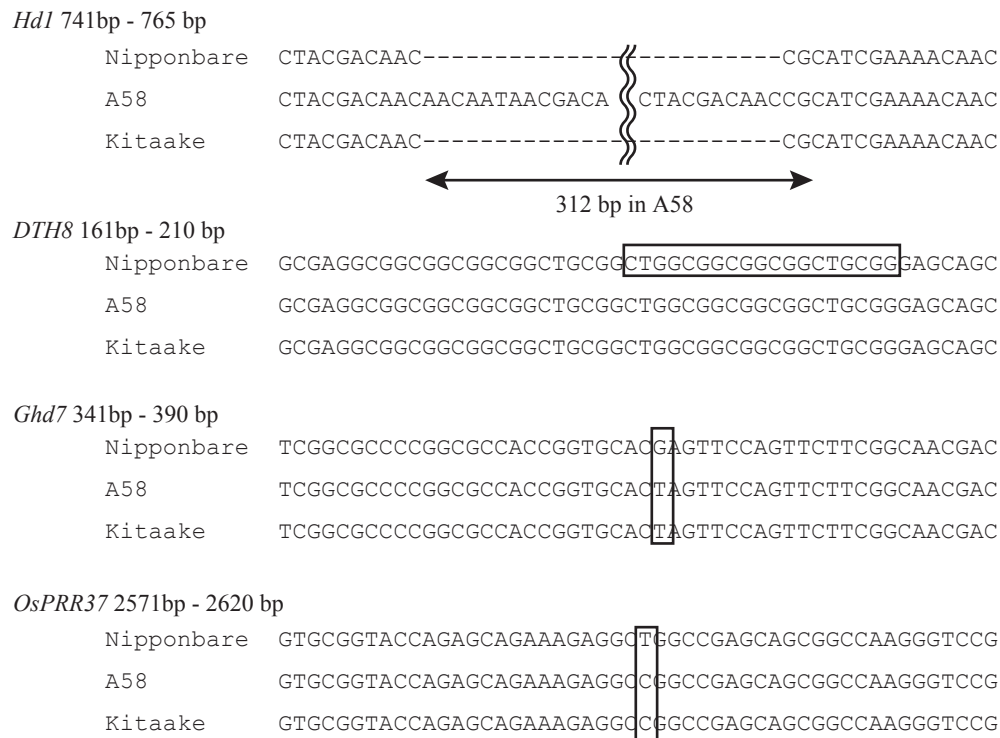

**Figure 3** Comparisons of partial nucleotide sequences from Nipponbare, A58, and Kitaake for the four major loci that affect DTH in Hokkaido.

The sequenced positions (based on Nipponbare) were selected using known polymorphisms among varieties in Hokkaido that were observed in previous studies (ICHITANI et al. 1997; FUJINO AND SEKIGUCHI 2005a; FUJINO AND SEKIGUCHI 2005b; NONOUE et al. 2008; FUJINO et al. 2013; KOO et al. 2013). *Hd1* showed multiple differences between A58 and Kitaake; Kitaake possesses a functional allele that is also found in Nipponbare. In *DTH8*, a 19-bp segment (indicated by a rectangle) was deleted in most of the other Hokkaido varieties, but not in Nipponbare, A58, and Kitaake, from which we could not detect any polymorphisms. For *Ghd7* and *OsPRR37*, SNPs observed in Nipponbare and the other two varieties are indicated by boxes.

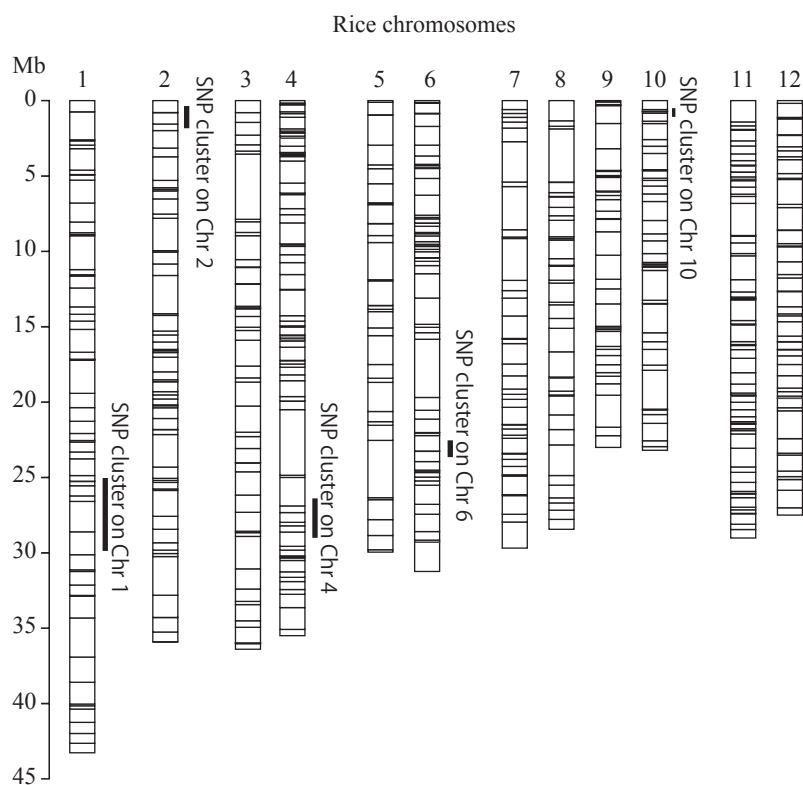

**Figure 4** Chromosomal positions of five SNP clusters.

Physical map positions of each SNP detected by ddRAD-Seq are shown by horizontal bars in each chromosome. Positions of SNP clusters that showed significant differences in allele frequency between early- and late-heading populations are indicated by vertical bars on the right side of each chromosome.



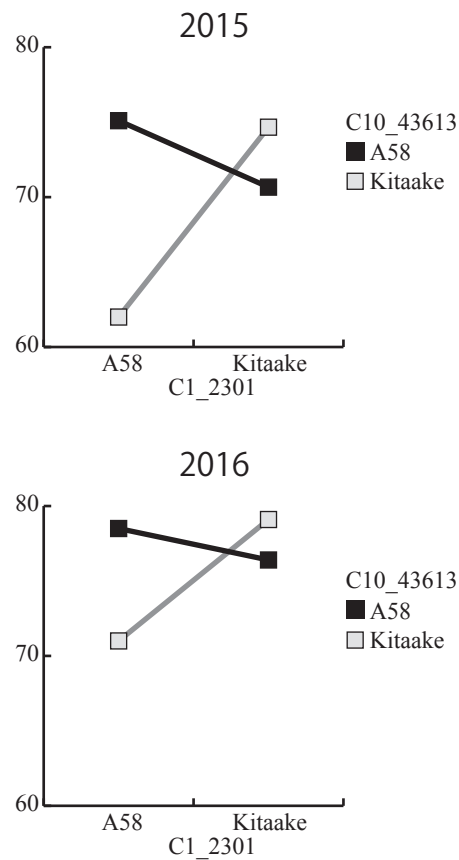

**Figure 5** Epistatic interaction between SNPs on chromosomes 1 and 10 on DTH observed in 2015 and 2016.

Average DTH values for the four combinations of genotypes with central SNPs (C1\_2301 and C10\_43613) in the clusters on Chs 1 and 10, which are indicated by squares. The case of Chs 1 and 10 were selected from all the combinations with Chs 1, 4, 6 and 10 (Figure S5). When the A58 SNP on Ch 10 (black line) and Kitaake SNP on Ch 10 (gray line) were respectively coupled with the different parental SNPs, epistatic (allelic) interactions occurred; in particular, the combination of the A58 allele on Ch 1 and Kitaake allele on Ch 10 resulted in the shortest DTH.

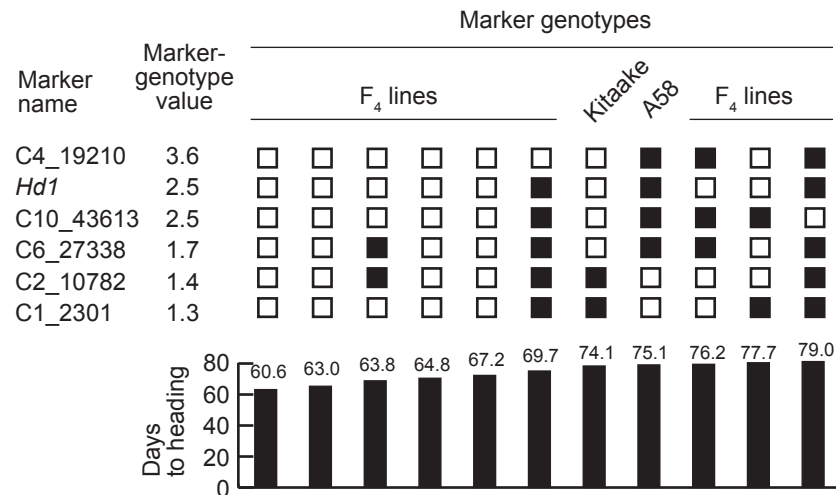

**Figure 6** Phenotypic relationships with combinations of six marker genotype values.

Among the 30 F<sub>4</sub> lines, nine retained the homozygous alleles in the six loci that corresponded to the SNP clusters with QTLs for DTH and Hd1. The effect of each locus on DTH was weighted according to marker genotype values (see Materials and Methods) based on DTH in 2016. Larger values indicate a stronger effect on DTH. Empty squares indicate shorter DTH effects relative to black squares. Kitaake contained four shorter DTH alleles in Ch 4, Hd1, Ch 10, and Ch 6, whereas A58 possessed two shorter DTH alleles in Ch 2 and Ch 1. The two parental cultivars, Kitaake and A58, had DTH of 74.1 and 75.1 days, respectively. DTH in the selected F<sub>4</sub> lines ranged from 60.6 to 79.0 days. Each marker name indicates the central SNP in the cluster.

### Proximal parental DTH phenotypes

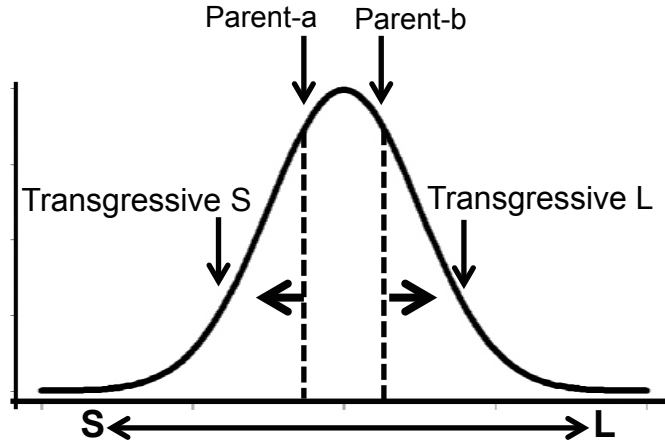

| QTLs     | 1 | 2 | 3 | 4 | 5 | 6 | 7 |
|----------|---|---|---|---|---|---|---|
| Parent-a | S | S | S | S | S | L | L |
| Parent-b | S | S | S | S | L | S | S |

#### Transgressive short DTH

|        |   |   |   |   |   |   |   |
|--------|---|---|---|---|---|---|---|
| Line-A | S | S | S | S | S | S | S |
| Line-B | S | S | S | S | S | S | L |
| Line-C | S | S | S | S | S | L | S |

#### Transgressive long DTH

|        |   |   |   |   |   |   |   |
|--------|---|---|---|---|---|---|---|
| Line-D | S | S | S | S | L | S | L |
| Line-E | S | S | S | S | L | L | S |
| Line-F | S | S | S | S | L | L | L |

### Distal parental DTH phenotypes

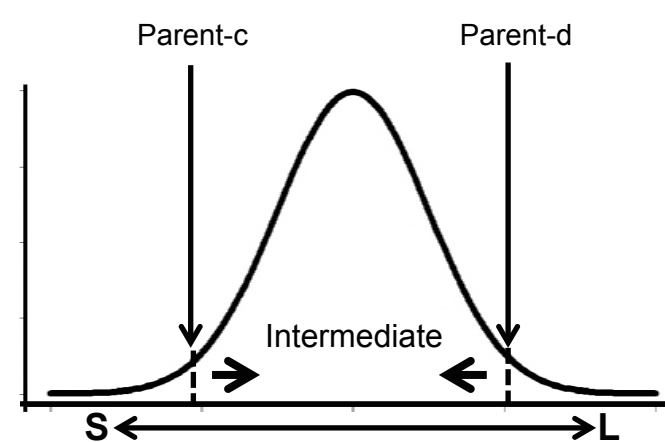

| QTLs     | 1 | 2 | 3 | 4 | 5 | 6 | 7 |
|----------|---|---|---|---|---|---|---|
| Parent-c | S | S | S | S | S | S | S |
| Parent-d | L | L | L | L | L | L | L |

#### Intermediate DTH

|        |   |   |   |   |   |   |   |
|--------|---|---|---|---|---|---|---|
| Line-G | S | S | S | S | S | S | L |
| Line-H | S | S | S | S | S | L | L |
| Line-I | S | S | S | S | L | L | L |
| Line-J | S | S | S | L | L | L | L |
| ▼      |   |   |   |   |   |   |   |
| ▼      |   |   |   |   |   |   |   |
| ▼      |   |   |   |   |   |   |   |
| Line-Z | L | L | L | L | L | L | S |

Effect of QTL 1>2>3>4>5>6>7

**Figure 7** Model of different segregation patterns that occurred in the F2 populations derived from two parental combinations of proximal and distal DTH phenotypes.

The left panel represents the segregation pattern of the F2 population between parent-a and -b with proximal DTH phenotypes due to the similar genotypes with a few differences. Because of differences in a few alleles with minor effects on DTH, the F2 progenies produced transgressive phenotypes. The right panel represents the F2 population produced by parents with distal phenotypes and opposite genotypes shows intermediate segregation between both parents. Most of the F2 progenies with mixed genotypes of the parental alleles did not have DTH phenotypes that exceeded those of the parental phenotypes. There are seven loci involved in DTH, and their effects on DTH are ordered as 1 >>> 7. S and L indicate the effect of an allele at each locus that makes DTH shorter or longer, respectively.
